# Supplementary material for: Determination of Albumin, Glucose, and Creatinine Employing a Single Sequential Injection Lab-at-Valve with Mono-Segmented Flow System Enabling In-Line Dilution, In-Line Single-Standard Calibration, and In-Line Standard Addition
Source: MDPI journal article supplement (doi:10.3390/molecules25071666), 2020-04-04
Supplement: s1 [file s1]

Article

# Determination of Albumin, Glucose and Creatinine Employing A Single Sequential Injection Lab-At-Valve with Mono-Segmented Flow System Enabling In-Line -Dilution, In-Line -Single Standard Calibration and In-Line-Standard Addition

Kanokwan Kiwfo <sup>1,2,3</sup>, Wasin Wongwilai <sup>1,4</sup>, Tadao Sakai <sup>3</sup>, Norio Teshima <sup>3</sup>, and Kate Grudpan <sup>1,2,4\*</sup>

<sup>1</sup> Center of Excellence for Innovation in Analytical Science and Technology, Chiang Mai University, Chiang Mai, 50200, Thailand

<sup>2</sup> Department of Chemistry and Graduate programs in Chemistry, Faculty of Science, Chiang Mai University, Chiang Mai, 50200, Thailand

<sup>3</sup> Department of Applied Chemistry, Aichi Institute of Technology, 1247 Yachigusa, Yakusa-cho, Toyota 470-0392, Japan

<sup>4</sup> Science and Technology Research Institute, Chiang Mai University, Chiang Mai, 50200, Thailand

\* Correspondence: kgrudpan@gmail.com; Tel.: +66-53941917

## Supplementary Materials

### Operation step of SIA-LAV and analytical signals

**Table S1.** Operational steps of the SI-LAV system for albumin determination.

| step | description                                                  | pump valve position | selection valve position | volume (μl)           | flow rate (μl/s) | remark                                |
|------|--------------------------------------------------------------|---------------------|--------------------------|-----------------------|------------------|---------------------------------------|
| A    | Aspirate DI water to syringe pump                            | In                  | -                        | 1000                  | 50               |                                       |
| B    | Aspirate air to holding coil                                 | out                 | 1                        | 100                   | 10               |                                       |
| *C   | Aspirate R1/W/S/ R1/W/S to holding coil                      | out                 | 3/9/6/<br>3/9/6          | 65/15/20/<br>65/15/20 | 2/2/2/<br>2/2/2/ |                                       |
| D    | Aspirate air to holding coil                                 | out                 | 1                        | 50                    | 10               | completed mono-segmented              |
| E    | Dispense reaction zone mixing chamber, hold reaction zone in | out                 | 1                        | 250                   | 250              | measured absorbance 605 nm for 60 sec |
| F    | Clean system                                                 | out                 | 10                       |                       |                  |                                       |

\*step C: S would be replaced by SD for on-line single standard calibration or standard addition.

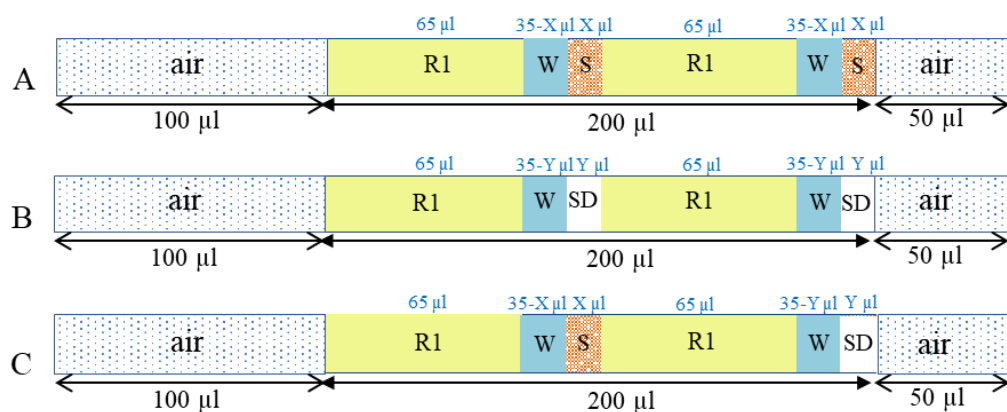

**Figure S1.** Sequence profile for albumin determination; (A) in-line sample dilution, (B) in-line single standard calibration; (C) in-line standard addition; W (DI water); S (sample); R1 (mixed reagent for albumin determination); SD (standard albumin solution).

**Table S2.** Operational steps of the SI-LAV system for glucose determination.

| Step | Description                                                          | Pump valve position | Selection valve position | Volume ( $\mu\text{l}$ )    | Flow rate ( $\mu\text{l}/\text{S}$ ) | Remark                                   |
|------|----------------------------------------------------------------------|---------------------|--------------------------|-----------------------------|--------------------------------------|------------------------------------------|
| A    | Aspirate DI water to syringe pump                                    | in                  | -                        | 1000                        | 50                                   |                                          |
| B    | Aspirate air to holding coil                                         | out                 | 1                        | 100                         | 10                                   |                                          |
| *C   | Aspirate R2/ R3/W/S / R2/R3 W/S to holding coil                      | out                 | 4/5/9/6/<br>4/5/9/6      | 50/10/20/20<br>/50/10/22/18 | 2/2/2/2/<br>2/2/2/2                  |                                          |
| D    | Aspirate air to holding coil                                         | out                 | 1                        | 50                          | 10                                   | completed mono-segmented                 |
| E    | Mixing of reaction zone by using flow reversal (n=2)                 | out                 |                          | 250                         | 20                                   | mixing reaction zone                     |
| F    | Dispense reaction zone mixing chamber, hold reaction zone in chamber | out                 | 1                        | 250                         | 250                                  | monitored absorbance 520 nm, for 120 sec |
| G    | Clean system                                                         | out                 | 10                       | -                           | -                                    |                                          |

\*step C: S would be replaced by SD for on-line single standard calibration or standard addition.

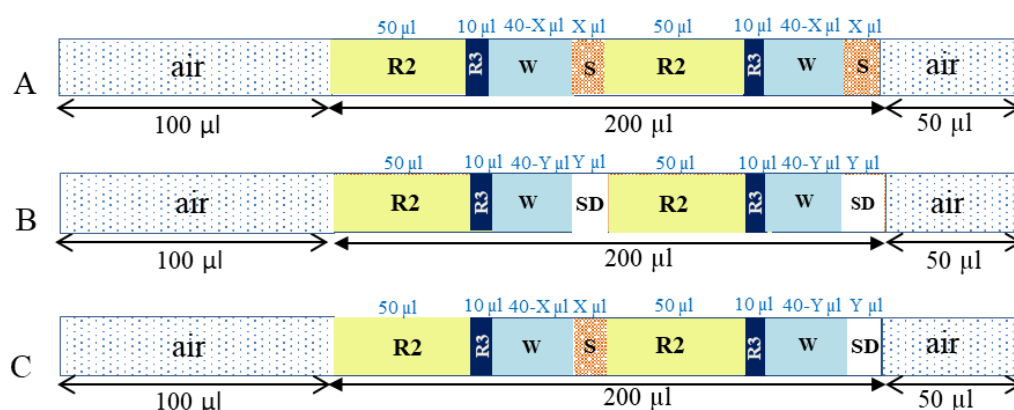

**Figure S2.** A sequence profile for glucose determination; (A) in-line sample dilution, (B) in-line single standard calibration; (C) in-line standard addition; W (DI water); S (sample); R2(mixed reagent for glucose determination); R3(glucose oxidase); SD (standard glucose solution).

**Table S3.** Operational steps of the SI-LAV system for on-line sample pre-treatment for creatinine determination.

| Step | Description                                 | Pump valve position | Selection valve position | Volume ( $\mu\text{l}$ ) | Flow rate ( $\mu\text{l/S}$ ) | Remark                   |
|------|---------------------------------------------|---------------------|--------------------------|--------------------------|-------------------------------|--------------------------|
| A    | Aspirate DI water to syringe pump           | in                  | -                        | 1000                     | 50                            |                          |
| B    | Aspirate air to holding coil                | out                 | 1                        | 100                      | 10                            |                          |
| *C   | Aspirate W/S/W/S to holding coil            | out                 | 9/6/9/7                  | 80/20/90/10              | 2/2/2/2                       |                          |
| D    | Aspirate air to holding coil                | out                 | 1                        | 50                       | 10                            | completed mono-segmented |
| E    | Flow reversal                               | out                 | 1                        | 250                      | 20                            |                          |
| F    | Aspirate standard added solution to holding | out                 | 1                        | 200                      | 5                             |                          |
| G    | Dispense standard added solution            | out                 | 2                        | 200                      | 5                             |                          |
| H    | Clean system                                | out                 | 10                       |                          |                               |                          |

\*step C: S would be replaced by SD for on-line single standard calibration or standard addition.

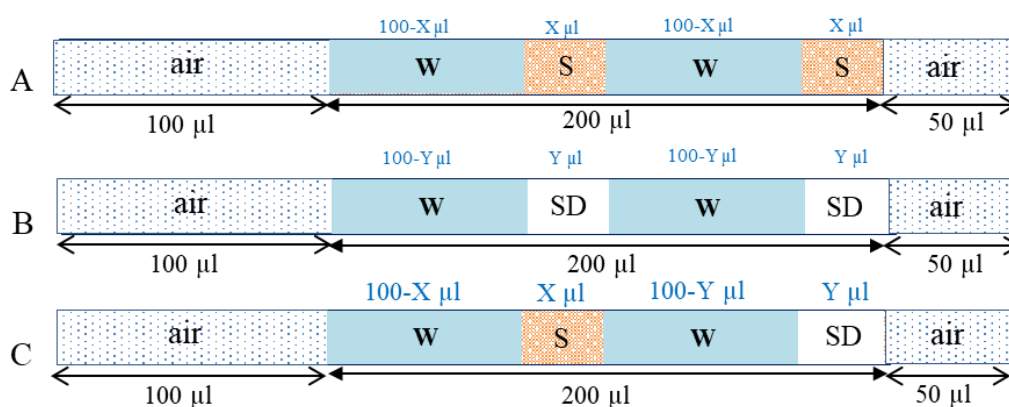**Figure S3.** Sequence profile for on-line sample pre-treatment creatinine solution; (A) in-line sample dilution, (B) in-line single standard calibration; (C) in-line standard addition; W (DI water); S (sample); R2(mixed reagent for glucose determination); SD (standard creatinine solution).**Table S4.** Operational steps of the SI-LAV system for creatinine determination.

| step | description                                                                       | pump valve position | selection valve position | volume ( $\mu\text{l}$ ) | flow rate ( $\mu\text{l/s}$ ) | remark                                  |
|------|-----------------------------------------------------------------------------------|---------------------|--------------------------|--------------------------|-------------------------------|-----------------------------------------|
| A    | Aspirate DI water to syringe pump                                                 | in                  | -                        | 1000                     | 50                            |                                         |
| B    | Aspirate air to holding coil                                                      | out                 | 1                        | 100                      | 10                            |                                         |
| C    | Aspirate pre-treated creatinine solution to holding coil                          | out                 | 2                        | 100                      | 2                             |                                         |
| D    | Aspirate air to holding coil                                                      | out                 | 1                        | 50                       | 10                            |                                         |
| E    | Aspirate R4 to holding coil                                                       | out                 | 8                        | 100                      | 2                             |                                         |
| F    | Dispense R4 to mixing chamber                                                     | out                 | 1                        | 100                      | 20                            |                                         |
| G    | Discard air                                                                       | out                 | 10                       | 50                       | 10                            |                                         |
| H    | Dispense standard added solution to mixing chamber, hold reaction zone in chamber | out                 | 1                        | 100                      | 250                           | monitoring absorbance 500 nm for 20 sec |
| I    | Clean system                                                                      | out                 | 10                       |                          |                               |                                         |
